# Supplementary material for: Ecological Status of Algeciras Bay, in a Highly Anthropised Area in South-West Europe, through Metal Assessment—Part II: Biotic Samples
Source: MDPI journal article supplement (doi:10.3390/toxics12030166), 2024-02-21
Supplement: s1 [file s1]

## **Supplementary Material**

# **Ecological Status of Algeciras Bay, in a Highly Anthropised Area in South-West Europe, through Metal Assessment— Part II: Biotic Samples**

**María José Casanueva-Marengo, María Dolores Galindo-Riaño \*, María Dolores Granado-Castro  
and Margarita Díaz-de-Alba**

Department of Analytical Chemistry, Institute of Biomolecules (INBIO), Faculty of Sciences, International Campus of Excellence of the Sea (CEI-MAR), University of Cadiz, Campus Rio San Pedro, 11510 Puerto Real, Cadiz, Spain; mariajose.casanueva@uca.es (M.J.C.-M.); dolores.granado@uca.es (M.D.G.-C.); margarita.diaz@uca.es (M.D.-d.-A.)

\* Correspondence: dolores.galindo@uca.es; Tel.: +34-956016362

**Table S1.** Geographical coordinates of sampling sites in Algeciras Bay

| Sampling sites     | Coordinates    |               |
|--------------------|----------------|---------------|
|                    | North          | West          |
| 1 – Getares beach  | 36° 05′ 28.31″ | 5° 26′ 10.93″ |
| 2 – Isla Verde     | 36° 07′ 8.43″  | 5° 25′ 37.60″ |
| 3 – Palmones       | 36° 10′ 19.51″ | 5° 25′ 27.14″ |
| 4 – Guadarranque   | 36° 10′ 32.21″ | 5° 24′ 27.47″ |
| 5 – Puente Mayorga | 36° 10′ 32.23″ | 5° 23′ 23.24″ |

**Table S2.** Analytical instruments and equipment used in this study

| Instrument and equipment                                  | Specifications                                                                                                   |
|-----------------------------------------------------------|------------------------------------------------------------------------------------------------------------------|
| Ultrapure water system                                    | Millipore Milli-Q50 (Millipore, Burlington, Massachusetts, USA)<br>(resistivity of 18.2 M $\Omega$ ·cm at 25 °C) |
| Closed Teflon reactor                                     | PTFE, 100 mL (BRAND, 1305 38, Wertheim, Germany)                                                                 |
| Vertical laminar flow cabinet (for samples and solutions) | Cruisair 870-FL (Cruma, Saint Boi de Llobregat, Barcelona, Spain)                                                |
| Fume chamber (for acids and other fuming reagents)        | Waldner 1800 (Wangen im Allgäu, Germany)                                                                         |
| Freeze dryer                                              | FreeZone Triad 7400030 (Cole-Parmer, Vernon Hills, Illinois, USA)                                                |
| Microwave assisted digester                               | Ethos 1600 (Milestone, Sorisole, Italy)                                                                          |
| Inductively coupled plasma-mass spectrometer              | X-Series ICP-MS equipment (Thermo Elemental, Winsford, UK) <sup>a</sup>                                          |

<sup>a</sup> ICP-MS equipment was calibrated using <sup>71</sup>Ga, <sup>103</sup>Rh and <sup>209</sup>Bi as internal standards in order to minimise matrix interference effects.

**Table S3.** Method detection limits (MDL) (mg/kg) for the analysis of the different samples (n = 8)

| <b>Sample / method</b>                          | <b>Zn</b> | <b>Cd</b> | <b>Pb</b> | <b>Cu</b> |
|-------------------------------------------------|-----------|-----------|-----------|-----------|
| Total content in gills and muscle /<br>(ICP-MS) | 0.21      | 0.001     | 0.02      | 0.03      |
| Total content in liver /<br>(ICP-MS)            | 0.04      | 0.002     | 0.01      | 0.03      |

**Table S4.** Recoveries (%) of the CRMs used for the assessment of the accuracy of the methodology (n = 4)

| CRM    | Recovery (%) |            |            |            |
|--------|--------------|------------|------------|------------|
|        | Zn           | Cd         | Pb         | Cu         |
| DORM-2 | 98.7 ± 4.4   | 106 ± 15   | 103 ± 6    | 92.9 ± 4.2 |
| DOLT-3 | 97.0 ± 1.7   | 97.4 ± 4.5 | 94.7 ± 6.9 | 95.4 ± 7.0 |

**Table S5.** Characteristics of fish analysed in Algeciras Bay, biota-water accumulation factor (BWAf) and biota-sediment accumulation factor (BSAF)

| Sampling | Site | Sample | Specie <sup>a</sup> | Tissue | Weight (g) | Length (cm) | BWAf |     |      |      | BSAF |     |      |       |
|----------|------|--------|---------------------|--------|------------|-------------|------|-----|------|------|------|-----|------|-------|
|          |      |        |                     |        |            |             | Zn   | Cd  | Pb   | Cu   | Zn   | Cd  | Pb   | Cu    |
| 1        | 1    | 1      | <i>D.s.</i>         | Gills  | 143        | 21          | 67.4 | *   | 8.5  | *    | 23.6 | *   | 0.4  | 0.4   |
| 1        | 1    | 1      | <i>D.s.</i>         | Liver  | 143        | 21          | 6.8  | *   | 2.3  | *    | 2.4  | *   | 0.1  | 93.0  |
| 1        | 1    | 1      | <i>D.s.</i>         | Muscle | 143        | 21          | 4.5  | *   | *    | *    | 1.6  | *   | *    | 0.2   |
| 1        | 1    | 4      | <i>S.s.</i>         | Gills  | 236        | 29          | 4.8  | *   | 0.4  | *    | 1.7  | *   | 0.02 | 0.6   |
| 1        | 1    | 4      | <i>S.s.</i>         | Liver  | 236        | 29          | 11.8 | *   | 3.3  | *    | 4.1  | *   | 0.2  | 115.6 |
| 1        | 1    | 4      | <i>S.s.</i>         | Muscle | 236        | 29          | 1.8  | *   | *    | *    | 0.6  | *   | *    | 0.1   |
| 1        | 1    | 5      | <i>S.s.</i>         | Gills  | 115        | 23          | 6.2  | *   | 0.7  | *    | 2.2  | *   | 0.03 | 0.6   |
| 1        | 1    | 5      | <i>S.s.</i>         | Liver  | 115        | 23          | 10.4 | *   | 3.9  | *    | 3.6  | *   | 0.2  | 54.1  |
| 1        | 1    | 5      | <i>S.s.</i>         | Muscle | 115        | 23          | 1.4  | *   | *    | *    | 0.5  | *   | *    | 0.1   |
| 1        | 1    | 7      | <i>S.s.</i>         | Gills  | 225        | 28          | 5.0  | *   | *    | *    | 1.8  | *   | *    | 0.3   |
| 1        | 1    | 7      | <i>S.s.</i>         | Liver  | 225        | 28          | 7.3  | *   | 2.2  | *    | 2.6  | *   | 0.1  | 79.6  |
| 1        | 1    | 7      | <i>S.s.</i>         | Muscle | 225        | 28          | 1.7  | *   | *    | *    | 0.6  | *   | *    | 0.1   |
| 1        | 3    | 1      | <i>T.l.</i>         | Liver  | 355        | 32          | 28.1 | 0.8 | 0.4  | 57.8 | 1.7  | 0.2 | 0.03 | 2.0   |
| 1        | 3    | 1      | <i>T.l.</i>         | Muscle | 355        | 32          | 3.4  | *   | 0.4  | 1.7  | 0.2  | *   | 0.03 | 0.1   |
| 1        | 5    | 1      | <i>T.l.</i>         | Gills  | 76         | 20          | *    | *   | 2.7  | *    | *    | *   | 0.1  | 0.4   |
| 1        | 5    | 1      | <i>T.l.</i>         | Liver  | 359        | 33          | 13.6 | *   | 1.0  | *    | 1.8  | *   | 0.02 | 0.2   |
| 1        | 5    | 1      | <i>T.l.</i>         | Muscle | 76         | 20          | 3.5  | *   | *    | *    | 0.5  | *   | *    | 0.1   |
| 1        | 5    | 2      | <i>S.s.</i>         | Gills  | 359        | 33          | 12.0 | *   | 1.7  | *    | 1.6  | *   | 0.03 | 0.4   |
| 1        | 5    | 2      | <i>S.s.</i>         | Liver  | 359        | 33          | 25.5 | *   | 5.1  | *    | 3.4  | *   | 0.1  | 137.9 |
| 1        | 5    | 2      | <i>S.s.</i>         | Muscle | 359        | 33          | 4.3  | *   | 0.6  | *    | 0.6  | *   | 0.01 | 0.1   |
| 2        | 1    | 1      | <i>S.s.</i>         | Gills  | 135        | 24          | 7.0  | *   | 23.5 | *    | 1.8  | *   | 2.7  | 0.6   |
| 2        | 1    | 1      | <i>S.s.</i>         | Liver  | 135        | 24          | 11.8 | *   | 1.7  | *    | 3.0  | *   | 0.2  | 132.4 |
| 2        | 1    | 1      | <i>S.s.</i>         | Muscle | 135        | 24          | 3.3  | *   | *    | *    | 0.8  | *   | *    | 0.3   |
| 2        | 1    | 2      | <i>S.s.</i>         | Gills  | 136        | 24          | 6.7  | *   | 0.7  | *    | 1.7  | *   | 0.1  | 1.0   |
| 2        | 1    | 2      | <i>S.s.</i>         | Muscle | 136        | 24          | 1.5  | *   | *    | *    | 0.4  | *   | *    | 0.2   |
| 2        | 1    | 3      | <i>S.s.</i>         | Gills  | 114        | 21          | 7.5  | *   | 9.4  | *    | 1.9  | *   | 1.1  | 0.6   |
| 2        | 1    | 3      | <i>S.s.</i>         | Liver  | 114        | 21          | 11.5 | *   | 3.4  | *    | 2.9  | *   | 0.4  | 4.7   |
| 2        | 1    | 3      | <i>S.s.</i>         | Muscle | 114        | 21          | 2.4  | *   | *    | *    | 0.6  | *   | *    | 0.1   |
| 2        | 1    | 4      | <i>S.s.</i>         | Liver  | 170        | 26          | 16.0 | *   | 1.7  | *    | 4.0  | *   | 0.2  | 19.2  |
| 2        | 1    | 4      | <i>S.s.</i>         | Muscle | 170        | 26          | 1.5  | *   | *    | *    | 0.4  | *   | *    | 0.1   |
| 2        | 1    | 5      | <i>S.s.</i>         | Gills  | 149        | 25          | 5.7  | *   | 0.6  | *    | 1.4  | *   | 0.1  | 0.6   |
| 2        | 1    | 5      | <i>S.s.</i>         | Gills  | 149        | 25          | 6.9  | *   | 0.4  | *    | 1.7  | *   | 0.04 | 0.9   |
| 2        | 1    | 5      | <i>S.s.</i>         | Liver  | 149        | 25          | 14.6 | *   | 1.6  | *    | 3.7  | *   | 0.2  | 208.5 |
| 2        | 1    | 5      | <i>S.s.</i>         | Muscle | 149        | 25          | 1.9  | *   | *    | *    | 0.5  | *   | *    | 0.4   |
| 2        | 1    | 6      | <i>S.s.</i>         | Gills  | 153        | 26          | 7.3  | *   | 9.2  | *    | 1.8  | *   | 1.1  | 0.8   |
| 2        | 1    | 6      | <i>S.s.</i>         | Muscle | 153        | 26          | 2.5  | *   | 0.2  | *    | 0.6  | *   | 0.02 | 0.1   |
| 2        | 1    | 8      | <i>S.s.</i>         | Gills  | 183        | 28          | 6.2  | *   | 0.1  | *    | 1.6  | *   | 0.02 | 0.7   |
| 2        | 1    | 8      | <i>S.s.</i>         | Liver  | 183        | 28          | 13.8 | *   | 1.3  | *    | 3.5  | *   | 0.1  | 345.1 |
| 2        | 1    | 8      | <i>S.s.</i>         | Muscle | 183        | 28          | 2.1  | *   | *    | *    | 0.5  | *   | *    | 0.3   |
| 2        | 1    | 9      | <i>S.s.</i>         | Gills  | 112        | 23          | 6.9  | *   | 0.2  | *    | 1.7  | *   | 0.03 | 1.0   |
| 2        | 1    | 9      | <i>S.s.</i>         | Muscle | 112        | 23          | 1.6  | *   | *    | *    | 0.4  | *   | *    | 0.1   |
| 2        | 1    | 10     | <i>S.s.</i>         | Gills  | 130        | 25          | 6.3  | *   | 1.3  | *    | 1.6  | *   | 0.2  | 0.8   |

|   |   |    |             |        |     |    |      |      |      |   |     |     |      |       |
|---|---|----|-------------|--------|-----|----|------|------|------|---|-----|-----|------|-------|
| 2 | 1 | 10 | <i>S.s.</i> | Liver  | 130 | 25 | 12.4 | *    | 2.4  | * | 3.1 | *   | 0.3  | 73.5  |
| 2 | 1 | 10 | <i>S.s.</i> | Muscle | 130 | 25 | 2.6  | *    | *    | * | 0.7 | *   | *    | 0.2   |
| 2 | 1 | 11 | <i>S.s.</i> | Gills  | 134 | 24 | 6.2  | *    | 0.3  | * | 1.6 | *   | 0.03 | 0.8   |
| 2 | 1 | 11 | <i>S.s.</i> | Liver  | 134 | 24 | 12.0 | *    | 1.2  | * | 3.0 | *   | 0.1  | 100.3 |
| 2 | 1 | 11 | <i>S.s.</i> | Muscle | 134 | 24 | 1.7  | *    | *    | * | 0.4 | *   | *    | 0.2   |
| 2 | 1 | 12 | <i>S.s.</i> | Gills  | 274 | 31 | 7.4  | *    | 1.0  | * | 1.9 | *   | 0.1  | 0.7   |
| 2 | 1 | 12 | <i>S.s.</i> | Muscle | 274 | 31 | 2.2  | *    | *    | * | 0.6 | *   | *    | 0.1   |
| 2 | 1 | 13 | <i>S.s.</i> | Gills  | 199 | 28 | 6.7  | *    | 0.2  | * | 1.7 | *   | 0.03 | 0.8   |
| 2 | 1 | 13 | <i>S.s.</i> | Liver  | 199 | 28 | 12.0 | *    | 1.3  | * | 3.0 | *   | 0.1  | 91.2  |
| 2 | 1 | 13 | <i>S.s.</i> | Muscle | 199 | 28 | 1.9  | *    | *    | * | 0.5 | *   | *    | 0.2   |
| 2 | 1 | 14 | <i>D.s.</i> | Gills  | 77  | 8  | 10.2 | *    | 1.8  | * | 2.6 | *   | 0.2  | 0.4   |
| 2 | 1 | 14 | <i>D.s.</i> | Liver  | 77  | 8  | 15.9 | *    | 0.6  | * | 4.0 | *   | 0.1  | 2.7   |
| 2 | 1 | 14 | <i>D.s.</i> | Muscle | 77  | 8  | 2.0  | *    | *    | * | 0.5 | *   | *    | 0.3   |
| 2 | 1 | 15 | <i>S.s.</i> | Gills  | 223 | 29 | 7.8  | *    | 0.2  | * | 2.0 | *   | 0.02 | 0.7   |
| 2 | 1 | 15 | <i>S.s.</i> | Liver  | 223 | 29 | 12.3 | *    | 1.7  | * | 3.1 | *   | 0.2  | 11.8  |
| 2 | 1 | 15 | <i>S.s.</i> | Muscle | 223 | 29 | 2.5  | *    | *    | * | 0.6 | *   | *    | 0.1   |
| 2 | 1 | 17 | <i>S.s.</i> | Gills  | 201 | 28 | 6.6  | *    | 0.5  | * | 1.7 | *   | 0.1  | 0.7   |
| 2 | 1 | 17 | <i>S.s.</i> | Liver  | 201 | 28 | 19.6 | *    | 4.2  | * | 4.9 | *   | 0.5  | 148.2 |
| 2 | 1 | 17 | <i>S.s.</i> | Muscle | 201 | 28 | 1.7  | *    | *    | * | 0.4 | *   | *    | 0.1   |
| 2 | 2 | 3  | <i>S.s.</i> | Gills  | 242 | 29 | 9.0  | 1.7  | 1.8  | * | 1.8 | *   | 0.04 | 0.4   |
| 2 | 2 | 3  | <i>S.s.</i> | Liver  | 242 | 29 | 18.5 | 19.3 | 5.7  | * | 3.6 | *   | 0.1  | 72.0  |
| 2 | 2 | 3  | <i>S.s.</i> | Muscle | 242 | 29 | 1.7  | *    | *    | * | 0.3 | *   | *    | 0.0   |
| 2 | 2 | 4  | <i>S.s.</i> | Gills  | 287 | 32 | 7.3  | *    | *    | * | 1.4 | *   | *    | 0.3   |
| 2 | 2 | 4  | <i>S.s.</i> | Muscle | 287 | 32 | 2.7  | *    | *    | * | 0.5 | *   | *    | 0.1   |
| 2 | 2 | 5  | <i>S.s.</i> | Gills  | 386 | 37 | 8.5  | *    | 2.1  | * | 1.7 | *   | 0.05 | 0.3   |
| 2 | 2 | 5  | <i>S.s.</i> | Muscle | 386 | 37 | 1.6  | *    | *    | * | 0.3 | *   | *    | 0.04  |
| 2 | 3 | 3  | <i>S.s.</i> | Gills  | 197 | 28 | 7.0  | 1.1  | 6.7  | * | 0.9 | 0.6 | 0.1  | 2.0   |
| 2 | 3 | 3  | <i>S.s.</i> | Liver  | 197 | 28 | 8.3  | 7.0  | 15.3 | * | 1.0 | 3.7 | 0.2  | 21.3  |
| 2 | 3 | 3  | <i>S.s.</i> | Muscle | 197 | 28 | 1.5  | *    | *    | * | 0.2 | *   | *    | 0.1   |
| 2 | 3 | 6  | <i>T.l.</i> | Gills  | 339 | 35 | 7.3  | *    | 2.5  | * | 0.9 | *   | 0.04 | 0.1   |
| 2 | 3 | 6  | <i>T.l.</i> | Liver  | 339 | 35 | 11.7 | 3.1  | 2.8  | * | 1.5 | 1.7 | 0.04 | 0.6   |
| 2 | 3 | 6  | <i>T.l.</i> | Muscle | 339 | 35 | 2.6  | *    | *    | * | 0.3 | *   | *    | 0.04  |
| 2 | 3 | 7  | <i>T.l.</i> | Gills  | 400 | 37 | 7.6  | *    | 4.7  | * | 0.9 | *   | 0.1  | 0.2   |
| 2 | 3 | 7  | <i>T.l.</i> | Liver  | 400 | 37 | 14.5 | 0.8  | 0.4  | * | 1.8 | 0.4 | 0.01 | 1.2   |
| 2 | 3 | 7  | <i>T.l.</i> | Muscle | 400 | 37 | 2.2  | *    | *    | * | 0.3 | *   | *    | 0.1   |
| 2 | 3 | 8  | <i>T.l.</i> | Gills  | 371 | 34 | 8.3  | *    | 3.2  | * | 1.0 | *   | 0.05 | 0.5   |
| 2 | 3 | 8  | <i>T.l.</i> | Muscle | 371 | 34 | 2.5  | *    | *    | * | 0.3 | *   | *    | 0.1   |
| 2 | 3 | 8  | <i>T.l.</i> | Muscle | 371 | 34 | 30.0 | 4.1  | 3.2  | * | 3.7 | 2.2 | 0.05 | *     |
| 2 | 3 | 9  | <i>T.l.</i> | Gills  | 327 | 32 | 7.7  | *    | 2.3  | * | 1.0 | *   | 0.03 | 0.1   |
| 2 | 3 | 9  | <i>T.l.</i> | Liver  | 327 | 32 | 13.1 | 0.8  | 0.2  | * | 1.6 | 0.4 | 0.01 | 0.8   |
| 2 | 3 | 9  | <i>T.l.</i> | Muscle | 327 | 32 | 2.7  | *    | *    | * | 0.3 | *   | *    | 0.1   |
| 2 | 3 | 10 | <i>T.l.</i> | Gills  | 353 | 34 | 7.7  | *    | 6.4  | * | 1.0 | *   | 0.1  | 0.1   |
| 2 | 3 | 10 | <i>T.l.</i> | Liver  | 353 | 34 | 13.5 | 1.5  | 4.0  | * | 1.7 | 0.8 | 0.1  | 1.0   |
| 2 | 3 | 10 | <i>T.l.</i> | Muscle | 353 | 34 | 1.7  | *    | *    | * | 0.2 | *   | *    | 0.1   |
| 2 | 3 | 11 | <i>T.l.</i> | Gills  | 291 | 31 | 6.6  | *    | 12.3 | * | 0.8 | *   | 0.2  | 0.2   |

|   |   |    |             |        |     |    |       |     |      |       |     |      |      |      |
|---|---|----|-------------|--------|-----|----|-------|-----|------|-------|-----|------|------|------|
| 2 | 3 | 11 | <i>T.l.</i> | Liver  | 291 | 31 | 14.4  | 2.9 | 1.8  | *     | 1.8 | 1.6  | 0.03 | 0.9  |
| 2 | 3 | 11 | <i>T.l.</i> | Muscle | 291 | 31 | 2.0   | *   | *    | *     | 0.3 | *    | *    | 0.2  |
| 2 | 3 | 12 | <i>T.l.</i> | Gills  | 319 | 34 | 7.2   | *   | 4.8  | *     | 0.9 | *    | 0.1  | 0.1  |
| 2 | 3 | 12 | <i>T.l.</i> | Liver  | 319 | 34 | 11.3  | 1.8 | 1.8  | *     | 1.4 | 0.9  | 0.03 | 0.6  |
| 2 | 3 | 12 | <i>T.l.</i> | Muscle | 319 | 34 | 1.7   | *   | *    | *     | 0.2 | *    | *    | 0.1  |
| 2 | 3 | 13 | <i>T.l.</i> | Gills  | 348 | 33 | 8.3   | *   | 5.0  | *     | 1.0 | *    | 0.1  | 0.4  |
| 2 | 3 | 13 | <i>T.l.</i> | Liver  | 348 | 33 | 20.4  | 1.9 | *    | *     | 2.5 | 1.0  | *    | 3.2  |
| 2 | 3 | 13 | <i>T.l.</i> | Muscle | 348 | 33 | 2.4   | *   | *    | *     | 0.3 | *    | *    | 0.05 |
| 2 | 3 | 14 | <i>T.l.</i> | Gills  | 400 | 39 | 8.5   | *   | 5.7  | *     | 1.1 | *    | 0.1  | 0.2  |
| 2 | 3 | 14 | <i>T.l.</i> | Liver  | 400 | 39 | 28.8  | 1.9 | 1.6  | *     | 3.6 | 1.0  | 0.02 | 4.5  |
| 2 | 3 | 14 | <i>T.l.</i> | Muscle | 400 | 39 | 1.6   | *   | *    | *     | 0.2 | *    | *    | 0.1  |
| 2 | 3 | 15 | <i>T.l.</i> | Gills  | 306 | 32 | 7.5   | *   | 3.4  | *     | 0.9 | *    | 0.05 | 0.2  |
| 2 | 3 | 15 | <i>T.l.</i> | Liver  | 306 | 32 | 10.7  | 1.2 | 0.7  | *     | 1.3 | 0.7  | 0.01 | 0.6  |
| 2 | 3 | 15 | <i>T.l.</i> | Muscle | 306 | 32 | 2.3   | *   | *    | *     | 0.3 | *    | *    | 0.1  |
| 2 | 3 | 16 | <i>T.l.</i> | Gills  | 290 | 38 | 8.1   | *   | 12.5 | *     | 1.0 | *    | 0.2  | 0.3  |
| 2 | 3 | 16 | <i>T.l.</i> | Liver  | 290 | 38 | 15.6  | 4.5 | 1.2  | *     | 1.9 | 2.4  | 0.02 | 1.0  |
| 2 | 3 | 16 | <i>T.l.</i> | Muscle | 290 | 38 | 1.9   | *   | *    | *     | 0.2 | *    | *    | 0.06 |
| 2 | 3 | 17 | <i>T.l.</i> | Gills  | 299 | 32 | 7.7   | *   | 3.0  | *     | 1.0 | *    | 0.04 | 0.2  |
| 2 | 3 | 17 | <i>T.l.</i> | Liver  | 299 | 32 | 13.7  | 1.9 | 0.8  | *     | 1.7 | 1.0  | 0.01 | 1.3  |
| 2 | 3 | 17 | <i>T.l.</i> | Muscle | 299 | 32 | 1.9   | *   | *    | *     | 0.2 | *    | *    | 0.1  |
| 2 | 4 | 2  | <i>S.s.</i> | Gills  | 213 | 28 | 39.7  | *   | *    | *     | 1.3 | *    | 0.03 | 0.7  |
| 2 | 4 | 2  | <i>S.s.</i> | Liver  | 213 | 28 | 58.0  | *   | *    | *     | 1.9 | *    | 0.1  | 11.1 |
| 2 | 4 | 2  | <i>S.s.</i> | Muscle | 213 | 28 | 13.4  | *   | *    | *     | 0.4 | *    | *    | 0.7  |
| 2 | 5 | 1  | <i>S.s.</i> | Gills  | 235 | 29 | 55.9  | *   | *    | 68.5  | 5.1 | *    | 0.1  | 3.4  |
| 2 | 5 | 1  | <i>S.s.</i> | Liver  | 235 | 29 | 42.5  | *   | *    | 209.9 | 3.9 | *    | 0.5  | 10.4 |
| 2 | 5 | 1  | <i>S.s.</i> | Muscle | 235 | 29 | 6.3   | *   | *    | 4.2   | 0.6 | *    | 0.02 | 0.2  |
| 2 | 5 | 3  | <i>S.s.</i> | Gills  | 172 | 26 | 27.2  | *   | *    | 6.2   | 2.5 | *    | 0.1  | 0.3  |
| 2 | 5 | 3  | <i>S.s.</i> | Liver  | 172 | 26 | 46.9  | *   | *    | 319.3 | 4.3 | *    | 0.8  | 15.8 |
| 2 | 5 | 3  | <i>S.s.</i> | Muscle | 172 | 26 | 7.0   | *   | *    | 1.4   | 0.6 | *    | *    | 0.1  |
| 3 | 1 | 1  | <i>S.s.</i> | Gills  | 174 | 25 | 58.3  | *   | 1.9  | *     | 1.2 | *    | 0.02 | 0.6  |
| 3 | 1 | 1  | <i>S.s.</i> | Liver  | 174 | 25 | 105.0 | *   | 10.2 | *     | 2.2 | 13.1 | 0.1  | 22.7 |
| 3 | 1 | 1  | <i>S.s.</i> | Muscle | 174 | 25 | 37.6  | *   | *    | *     | 0.8 | *    | *    | 0.1  |
| 3 | 1 | 3  | <i>S.s.</i> | Liver  | 150 | 25 | 116.3 | *   | 20.8 | *     | 2.4 | 5.8  | 0.3  | 74.3 |
| 3 | 1 | 3  | <i>S.s.</i> | Muscle | 150 | 25 | 18.5  | *   | *    | *     | 0.4 | *    | *    | 0.05 |
| 3 | 1 | 4  | <i>S.s.</i> | Gills  | 256 | 31 | 79.5  | *   | 7.0  | *     | 1.6 | *    | 0.1  | 0.3  |
| 3 | 1 | 4  | <i>S.s.</i> | Liver  | 256 | 31 | 165.6 | *   | 15.0 | *     | 3.4 | 27.5 | 0.2  | 7.7  |
| 3 | 1 | 4  | <i>S.s.</i> | Muscle | 256 | 31 | 16.5  | *   | *    | *     | 0.3 | *    | *    | 0.1  |
| 3 | 1 | 6  | <i>S.s.</i> | Gills  | 237 | 29 | 50.5  | *   | 2.1  | *     | 1.0 | *    | 0.03 | 1.0  |
| 3 | 1 | 6  | <i>S.s.</i> | Muscle | 237 | 29 | 18.4  | *   | 0.7  | *     | 0.4 | *    | 0.01 | 0.1  |
| 3 | 1 | 7  | <i>S.s.</i> | Gills  | 237 | 29 | 53.7  | *   | 3.2  | *     | 1.1 | *    | 0.04 | 0.4  |
| 3 | 1 | 7  | <i>S.s.</i> | Liver  | 237 | 29 | 117.2 | *   | 28.0 | *     | 2.4 | 20.2 | 0.3  | 34.2 |
| 3 | 1 | 7  | <i>S.s.</i> | Muscle | 237 | 29 | 25.8  | *   | 0.7  | *     | 0.5 | *    | 0.01 | 0.1  |
| 3 | 1 | 8  | <i>S.p.</i> | Gills  | 345 | 26 | 85.8  | *   | 4.2  | *     | 1.8 | *    | 0.1  | 0.2  |
| 3 | 1 | 8  | <i>S.p.</i> | Gills  | 345 | 26 | 68.6  | *   | 4.2  | *     | 1.4 | *    | 0.1  | 0.4  |
| 3 | 1 | 8  | <i>S.p.</i> | Liver  | 345 | 26 | 187.3 | *   | 5.5  | *     | 3.8 | 30.1 | 0.1  | 4.7  |



|   |   |    |             |        |      |    |       |   |      |   |      |      |      |      |
|---|---|----|-------------|--------|------|----|-------|---|------|---|------|------|------|------|
| 3 | 1 | 8  | <i>S.p.</i> | Muscle | 345  | 26 | 38.4  | * | *    | * | 0.8  | *    | *    | 0.1  |
| 3 | 1 | 9  | <i>T.l.</i> | Gills  | 261  | 29 | 1343  | * | *    | * | 27.5 | *    | *    | 0.2  |
| 3 | 1 | 9  | <i>T.l.</i> | Liver  | 261  | 29 | 586.2 | * | *    | * | 12.0 | 1.1  | *    | 0.6  |
| 3 | 1 | 10 | <i>S.p.</i> | Gills  | 206  | 20 | 53.8  | * | 0.8  | * | 1.1  | *    | 0.01 | 0.3  |
| 3 | 1 | 10 | <i>S.p.</i> | Liver  | 206  | 20 | 79.6  | * | *    | * | 1.6  | 2.3  | *    | 0.4  |
| 3 | 1 | 10 | <i>S.p.</i> | Muscle | 206  | 20 | 16.3  | * | 3.2  | * | 0.3  | *    | 0.04 | 0.04 |
| 3 | 1 | 11 | <i>S.s.</i> | Gills  | 348  | 35 | 75.9  | * | 3.1  | * | 1.6  | *    | 0.04 | 0.3  |
| 3 | 1 | 11 | <i>S.s.</i> | Liver  | 348  | 35 | 143.3 | * | 9.6  | * | 2.9  | 5.6  | 0.1  | 23.4 |
| 3 | 1 | 11 | <i>S.s.</i> | Muscle | 348  | 35 | 19.0  | * | *    | * | 0.4  | *    | *    | 0.1  |
| 3 | 1 | 12 | <i>S.p.</i> | Gills  | 324  | 25 | 57.4  | * | 1.1  | * | 1.2  | *    | 0.01 | 0.2  |
| 3 | 1 | 12 | <i>S.p.</i> | Liver  | 324  | 25 | 100.6 | * | *    | * | 2.1  | 2.9  | *    | 0.5  |
| 3 | 1 | 12 | <i>S.p.</i> | Muscle | 324  | 25 | 22.1  | * | *    | * | 0.5  | *    | *    | 0.1  |
| 3 | 1 | 12 | <i>S.p.</i> | Muscle | 324  | 25 | 42.1  | * | *    | * | 0.9  | *    | *    | 0.2  |
| 3 | 1 | 13 | <i>S.p.</i> | Gills  | >440 | 35 | 69.3  | * | *    | * | 1.4  | *    | *    | 0.1  |
| 3 | 1 | 13 | <i>S.p.</i> | Muscle | >440 | 35 | 34.0  | * | 11.4 | * | 0.7  | *    | 0.1  | 0.1  |
| 3 | 1 | 13 | <i>S.p.</i> | Muscle | >440 | 35 | 37.4  | * | *    | * | 0.8  | *    | *    | 0.1  |
| 3 | 2 | 7  | <i>S.p.</i> | Gills  | >440 | 31 | 38.5  | * | 0.8  | * | 1.1  | *    | 0.01 | 0.2  |
| 3 | 2 | 7  | <i>S.p.</i> | Liver  | >440 | 31 | 78.4  | * | *    | * | 2.2  | 0.9  | *    | 0.4  |
| 3 | 2 | 7  | <i>S.p.</i> | Muscle | >440 | 31 | 18.2  | * | *    | * | 0.5  | *    | *    | 0.1  |
| 3 | 2 | 8  | <i>S.p.</i> | Gills  | 284  | 28 | 42.9  | * | 6.0  | * | 1.2  | *    | 0.1  | 0.1  |
| 3 | 2 | 8  | <i>S.p.</i> | Liver  | 284  | 28 | 314.7 | * | 0.2  | * | 8.9  | 1.2  | 0.01 | 0.6  |
| 3 | 2 | 8  | <i>S.p.</i> | Muscle | 284  | 28 | 21.5  | * | *    | * | 0.6  | *    | *    | 0.1  |
| 3 | 2 | 9  | <i>S.p.</i> | Gills  | 293  | 24 | 34.1  | * | 1.1  | * | 1.0  | *    | 0.02 | 0.1  |
| 3 | 2 | 9  | <i>S.p.</i> | Liver  | 293  | 24 | 126.9 | * | *    | * | 3.6  | 0.9  | *    | 0.4  |
| 3 | 2 | 9  | <i>S.p.</i> | Muscle | 293  | 24 | 10.7  | * | *    | * | 0.3  | *    | *    | 0.01 |
| 3 | 2 | 10 | <i>S.p.</i> | Gills  | 341  | 28 | 25.5  | * | 2.0  | * | 0.7  | 0.8  | 0.03 | *    |
| 3 | 2 | 10 | <i>S.p.</i> | Liver  | 341  | 28 | 193.6 | * | 2.0  | * | 5.5  | 14.8 | 0.04 | 1.2  |
| 3 | 3 | 1  | <i>T.l.</i> | Gills  | 175  | 26 | 31.2  | * | 3.8  | * | 0.9  | *    | 0.04 | 0.1  |
| 3 | 3 | 1  | <i>T.l.</i> | Muscle | 175  | 26 | 13.0  | * | *    | * | 0.4  | *    | *    | 0.1  |
| 3 | 3 | 3  | <i>S.s.</i> | Liver  | 196  | 26 | 37.2  | * | 19.7 | * | 1.1  | 2.3  | 0.2  | 11.4 |
| 3 | 3 | 3  | <i>S.s.</i> | Muscle | 196  | 26 | 7.4   | * | 0.9  | * | 0.2  | *    | 0.01 | 0.03 |
| 3 | 3 | 4  | <i>S.s.</i> | Gills  | 75   | 20 | 32.7  | * | 22.5 | * | 1.0  | *    | 0.2  | 0.1  |
| 3 | 3 | 4  | <i>S.s.</i> | Liver  | 75   | 20 | 57.6  | * | 4.5  | * | 1.7  | *    | 0.04 | 5.2  |
| 3 | 3 | 4  | <i>S.s.</i> | Muscle | 75   | 20 | 13.0  | * | *    | * | 0.4  | *    | *    | 0.03 |
| 3 | 3 | 5  | <i>T.l.</i> | Gills  | 177  | 27 | *     | * | *    | * | *    | *    | *    | *    |
| 3 | 3 | 5  | <i>T.l.</i> | Liver  | 177  | 27 | 72.9  | * | 2.8  | * | 2.2  | 6.8  | 0.03 | 1.0  |
| 3 | 3 | 5  | <i>T.l.</i> | Muscle | 177  | 27 | 10.7  | * | 1.6  | * | 0.3  | *    | 0.01 | 0.02 |
| 3 | 3 | 6  | <i>S.s.</i> | Gills  | 148  | 26 | 17.0  | * | 33.3 | * | 0.5  | *    | 0.3  | 0.8  |
| 3 | 3 | 6  | <i>S.s.</i> | Liver  | 148  | 26 | 29.7  | * | 6.7  | * | 0.9  | 0.4  | 0.1  | 14.6 |
| 3 | 3 | 6  | <i>S.s.</i> | Muscle | 148  | 26 | 6.1   | * | *    | * | 0.2  | *    | *    | 0.02 |
| 3 | 3 | 7  | <i>S.s.</i> | Gills  | 217  | 30 | 29.4  | * | 7.9  | * | 0.9  | *    | 0.1  | 0.1  |
| 3 | 3 | 7  | <i>S.s.</i> | Liver  | 217  | 30 | 63.2  | * | 1.5  | * | 1.9  | 1.4  | 0.01 | 2.7  |
| 3 | 3 | 7  | <i>S.s.</i> | Muscle | 217  | 30 | *     | * | *    | * | *    | *    | *    | *    |
| 3 | 4 | 1  | <i>T.l.</i> | Gills  | 175  | 26 | 57.3  | * | *    | * | 0.9  | *    | 0.1  | 0.1  |
| 3 | 4 | 1  | <i>T.l.</i> | Liver  | 175  | 26 | 115.9 | * | *    | * | 1.8  | 2.4  | 0.04 | 1.5  |

|   |   |   |             |        |      |    |       |   |      |       |     |     |      |      |
|---|---|---|-------------|--------|------|----|-------|---|------|-------|-----|-----|------|------|
| 3 | 4 | 1 | <i>T.l.</i> | Muscle | 175  | 26 | 10.3  | * | *    | *     | 0.2 | *   | *    | 0.02 |
| 3 | 4 | 2 | <i>S.p.</i> | Gills  | 133  | 19 | 70.3  | * | *    | *     | 1.1 | *   | 0.1  | 0.1  |
| 3 | 4 | 2 | <i>S.p.</i> | Liver  | 133  | 19 | 264.6 | * | *    | *     | 4.0 | 3.4 | *    | 0.7  |
| 3 | 4 | 2 | <i>S.p.</i> | Muscle | 133  | 19 | 25.3  | * | *    | *     | 0.4 | *   | *    | 0.04 |
| 3 | 4 | 4 | <i>S.p.</i> | Gills  | 108  | 18 | 98.5  | * | *    | *     | 1.5 | *   | 0.02 | 0.1  |
| 3 | 4 | 4 | <i>S.p.</i> | Liver  | 108  | 18 | 240.5 | * | *    | *     | 3.7 | 4.7 | *    | 0.3  |
| 3 | 4 | 4 | <i>S.p.</i> | Muscle | 108  | 18 | 36.7  | * | *    | *     | 0.6 | *   | 0.01 | 0.1  |
| 3 | 4 | 5 | <i>T.l.</i> | Gills  | 135  | 23 | 53.9  | * | *    | *     | 0.8 | *   | 0.04 | 0.1  |
| 3 | 4 | 5 | <i>T.l.</i> | Liver  | 135  | 23 | 60.6  | * | *    | *     | 0.9 | 1.9 | 0.02 | 0.3  |
| 3 | 4 | 5 | <i>T.l.</i> | Muscle | 135  | 23 | 14.4  | * | *    | *     | 0.2 | *   | 0.1  | 0.03 |
| 3 | 4 | 6 | <i>T.l.</i> | Gills  | 135  | 24 | 57.0  | * | *    | *     | 0.9 | *   | 0.1  | 0.1  |
| 3 | 4 | 6 | <i>T.l.</i> | Liver  | 135  | 24 | 77.0  | * | *    | *     | 1.2 | 5.4 | 0.1  | 7.8  |
| 3 | 4 | 6 | <i>T.l.</i> | Muscle | 135  | 24 | 15.3  | * | *    | *     | 0.2 | *   | *    | 0.03 |
| 3 | 5 | 1 | <i>T.l.</i> | Gills  | 124  | 23 | 11.7  | * | 1.8  | 4.7   | 1.4 | *   | 0.03 | 0.1  |
| 3 | 5 | 1 | <i>T.l.</i> | Liver  | 124  | 23 | 20.3  | * | 2.4  | 40.1  | 2.5 | 2.8 | 0.04 | 0.9  |
| 3 | 5 | 2 | <i>S.s.</i> | Gills  | >440 | 36 | 9.3   | * | 3.2  | 6.8   | 1.1 | *   | 0.1  | 0.2  |
| 3 | 5 | 2 | <i>S.s.</i> | Liver  | >440 | 36 | 10.9  | * | *    | 153.4 | 1.3 | 0.2 | *    | 3.5  |
| 3 | 5 | 2 | <i>S.s.</i> | Muscle | >440 | 36 | 3.4   | * | *    | 1.3   | 0.4 | *   | *    | 0.03 |
| 3 | 5 | 3 | <i>S.s.</i> | Gills  | 427  | 35 | 10.5  | * | 23.6 | 11.5  | 1.3 | *   | 0.4  | 0.3  |
| 3 | 5 | 3 | <i>S.s.</i> | Liver  | 427  | 35 | 19.5  | * | 0.4  | 48.0  | 2.4 | 0.4 | 0.01 | 1.1  |
| 3 | 5 | 3 | <i>S.s.</i> | Muscle | 427  | 35 | 4.3   | * | *    | 2.1   | 0.5 | *   | *    | 0.05 |
| 3 | 5 | 4 | <i>S.s.</i> | Gills  | 137  | 28 | 10.7  | * | 19.5 | 7.5   | 1.3 | *   | 0.4  | 0.2  |
| 3 | 5 | 4 | <i>S.s.</i> | Muscle | 137  | 28 | 3.1   | * | *    | 1.9   | 0.4 | *   | *    | 0.04 |
| 4 | 1 | 1 | <i>S.s.</i> | Gills  | 193  | 26 | 52.1  | * | 0.4  | 2.0   | 1.3 | *   | 0.01 | 0.2  |
| 4 | 1 | 1 | <i>S.s.</i> | Liver  | 193  | 26 | 44.6  | * | 2.4  | 47.0  | 1.1 | 1.2 | 0.03 | 4.8  |
| 4 | 1 | 1 | <i>S.s.</i> | Muscle | 193  | 26 | 20.2  | * | *    | 0.4   | 0.5 | *   | *    | 0.04 |
| 4 | 1 | 2 | <i>S.s.</i> | Gills  | 193  | 26 | 62.3  | * | 2.2  | 1.1   | 1.6 | *   | 0.03 | 0.1  |
| 4 | 1 | 2 | <i>S.s.</i> | Liver  | 193  | 26 | 76.5  | * | 7.2  | 182.1 | 1.9 | 4.1 | 0.1  | 18.4 |
| 4 | 1 | 2 | <i>S.s.</i> | Muscle | 193  | 26 | 19.4  | * | *    | 0.5   | 0.5 | *   | *    | 0.05 |
| 4 | 1 | 3 | <i>S.s.</i> | Gills  | 130  | 24 | 70.7  | * | 5.0  | 1.2   | 1.8 | *   | 0.1  | 0.1  |
| 4 | 1 | 3 | <i>S.s.</i> | Gills  | 130  | 24 | 60.1  | * | *    | 2.0   | 1.5 | *   | *    | 0.2  |
| 4 | 1 | 3 | <i>S.s.</i> | Liver  | 130  | 24 | 113.5 | * | 12.3 | 243.6 | 2.9 | 4.3 | 0.1  | 24.7 |
| 4 | 1 | 3 | <i>S.s.</i> | Muscle | 130  | 24 | 18.4  | * | *    | 0.3   | 0.5 | *   | *    | 0.03 |
| 4 | 1 | 4 | <i>S.s.</i> | Gills  | 122  | 25 | 55.2  | * | 4.4  | 2.3   | 1.4 | *   | 0.1  | 0.2  |
| 4 | 1 | 4 | <i>S.s.</i> | Liver  | 122  | 25 | 79.7  | * | 23.8 | 81.1  | 2.0 | 7.1 | 0.3  | 8.2  |
| 4 | 1 | 4 | <i>S.s.</i> | Muscle | 122  | 25 | 15.8  | * | *    | 0.5   | 0.4 | *   | *    | 0.05 |
| 4 | 1 | 5 | <i>S.s.</i> | Gills  | 166  | 26 | 43.7  | * | 4.6  | 2.7   | 1.1 | *   | 0.1  | 0.3  |
| 4 | 1 | 5 | <i>S.s.</i> | Liver  | 166  | 26 | 100.1 | * | 16.0 | 192.0 | 2.5 | 4.4 | 0.2  | 19.4 |
| 4 | 1 | 5 | <i>S.s.</i> | Muscle | 166  | 26 | 18.7  | * | *    | 0.3   | 0.5 | *   | *    | 0.03 |
| 4 | 1 | 6 | <i>S.s.</i> | Gills  | 117  | 23 | 6.0   | * | 3.3  | 0.3   | 0.2 | *   | 0.04 | 0.03 |
| 4 | 1 | 6 | <i>S.s.</i> | Liver  | 117  | 23 | 148.1 | * | 10.8 | 77.2  | 3.7 | 6.0 | 0.1  | 7.8  |
| 4 | 1 | 6 | <i>S.s.</i> | Muscle | 117  | 23 | 13.7  | * | *    | 0.3   | 0.3 | *   | *    | 0.03 |
| 4 | 1 | 7 | <i>S.s.</i> | Gills  | 82   | 20 | 53.3  | * | 1.6  | 1.4   | 1.3 | *   | 0.02 | 0.1  |
| 4 | 1 | 7 | <i>S.s.</i> | Liver  | 82   | 20 | 17.8  | * | 1.2  | 14.5  | 0.4 | 0.3 | 0.01 | 1.5  |
| 4 | 1 | 7 | <i>S.s.</i> | Muscle | 82   | 20 | 22.2  | * | *    | 0.5   | 0.6 | *   | *    | 0.05 |

|   |   |    |             |        |     |    |       |   |      |      |     |      |      |      |
|---|---|----|-------------|--------|-----|----|-------|---|------|------|-----|------|------|------|
| 4 | 1 | 9  | <i>S.p.</i> | Gills  | 149 | 20 | 55.1  | * | 0.8  | 1.5  | 1.4 | *    | 0.01 | 0.1  |
| 4 | 1 | 9  | <i>S.p.</i> | Liver  | 149 | 20 | 351.6 | * | *    | 15.8 | 8.9 | 2.5  | *    | 1.6  |
| 4 | 1 | 9  | <i>S.p.</i> | Muscle | 149 | 20 | 19.2  | * | *    | 0.4  | 0.5 | *    | *    | 0.04 |
| 4 | 1 | 10 | <i>D.s.</i> | Gills  | 149 | 20 | 114.7 | * | 81.3 | 1.6  | 2.9 | *    | 0.9  | 0.2  |
| 4 | 1 | 10 | <i>D.s.</i> | Liver  | 149 | 20 | 145.5 | * | 23.0 | 10.2 | 3.7 | 13.3 | 0.3  | 1.0  |
| 4 | 1 | 10 | <i>D.s.</i> | Muscle | 149 | 20 | 33.6  | * | 3.8  | 0.7  | 0.8 | *    | 0.04 | 0.1  |
| 4 | 2 | 2  | <i>D.s.</i> | Gills  | 60  | 36 | 81.5  | * | *    | *    | 2.3 | *    | 0.2  | 0.2  |
| 4 | 2 | 2  | <i>D.s.</i> | Liver  | 60  | 36 | 159.6 | * | *    | *    | 4.5 | 10.3 | 0.1  | 1.3  |
| 4 | 2 | 2  | <i>D.s.</i> | Muscle | 60  | 36 | 23.5  | * | *    | *    | 0.7 | *    | *    | 0.02 |
| 4 | 2 | 3  | <i>D.s.</i> | Gills  | 153 | 21 | 69.3  | * | *    | *    | 2.0 | *    | 0.1  | 0.1  |
| 4 | 2 | 3  | <i>D.s.</i> | Liver  | 153 | 21 | 72.7  | * | *    | *    | 2.1 | 1.3  | 0.03 | 0.6  |
| 4 | 2 | 3  | <i>D.s.</i> | Muscle | 153 | 21 | 47.1  | * | *    | *    | 1.3 | *    | *    | 0.02 |
| 4 | 4 | 1  | <i>S.s.</i> | Gills  | 202 | 27 | 115.9 | * | 1.3  | *    | 1.9 | *    | 0.01 | 0.2  |
| 4 | 4 | 1  | <i>S.s.</i> | Liver  | 202 | 27 | 79.7  | * | 15.6 | *    | 1.3 | 1.3  | 0.1  | 16.7 |
| 4 | 4 | 1  | <i>S.s.</i> | Muscle | 202 | 27 | 20.4  | * | *    | *    | 0.3 | *    | *    | 0.03 |
| 4 | 4 | 2  | <i>S.s.</i> | Gills  | 79  | 20 | 70.2  | * | *    | *    | 1.2 | *    | *    | 0.2  |
| 4 | 4 | 2  | <i>S.s.</i> | Liver  | 79  | 20 | 16.7  | * | 2.6  | *    | 0.3 | *    | 0.02 | 1.4  |
| 4 | 4 | 4  | <i>T.l.</i> | Gills  | 113 | 22 | 81.4  | * | 2.1  | *    | 1.3 | *    | 0.01 | 0.2  |
| 4 | 4 | 4  | <i>T.l.</i> | Liver  | 113 | 22 | 156.5 | * | 8.3  | *    | 2.6 | 2.1  | 0.1  | 1.3  |
| 4 | 4 | 4  | <i>T.l.</i> | Muscle | 113 | 22 | 27.7  | * | *    | *    | 0.5 | *    | *    | 0.04 |
| 4 | 4 | 9  | <i>S.p.</i> | Gills  | 118 | 17 | 91.8  | * | 14.1 | *    | 1.5 | *    | 0.1  | 0.1  |
| 4 | 4 | 9  | <i>S.p.</i> | Liver  | 118 | 17 | 195.7 | * | *    | *    | 3.2 | 4.7  | *    | 1.7  |
| 4 | 4 | 9  | <i>S.p.</i> | Muscle | 118 | 17 | 32.6  | * | 2.6  | *    | 0.5 | *    | 0.02 | 0.03 |
| 4 | 4 | 10 | <i>S.p.</i> | Gills  | 88  | 16 | 134.6 | * | *    | *    | 2.2 | *    | *    | 0.1  |
| 4 | 4 | 10 | <i>S.p.</i> | Muscle | 88  | 16 | 24.4  | * | *    | *    | 0.4 | *    | *    | 0.1  |
| 4 | 4 | 11 | <i>S.p.</i> | Gills  | 101 | 17 | 111.6 | * | 1.1  | *    | 1.8 | *    | 0.01 | 0.1  |
| 4 | 4 | 11 | <i>S.p.</i> | Liver  | 101 | 17 | 262.6 | * | *    | *    | 4.3 | 6.7  | *    | 0.9  |
| 4 | 4 | 11 | <i>S.p.</i> | Muscle | 101 | 17 | 24.5  | * | *    | *    | 0.4 | *    | *    | 0.04 |

<sup>a</sup> *S.s.*: *Solea senegalensis*, *S.p.*: *Scorpaena porcus*, *T.l.*: *Trigloporus lastoviza*, *D.s.*: *Diplodus sargus sargus*

\* Could not be calculated (Either the metal concentration in the fish or in the sediment was <LD)
